# Supplementary material for: Efficient synthesis of pyrido[2,3-d]pyrimidine-7-carboxylic acids catalyzed by a TiO2/SiO2 nanocomposite in aqueous media at room temperature
Source: publisher site journal article supplement (doi:10.1515/znb-2018-0076), 2018-07-11

# Supporting Information

**Sepehr Sadegh-Samiei\* and Shahrzad Abdolmohammadi**

**Efficient synthesis of pyrido[2,3-*d*]pyrimidine-7-carboxylic acids catalyzed by a TiO<sub>2</sub>/SiO<sub>2</sub> nanocomposite in aqueous media at room temperature**

DOI: 10.1515/znb-2018-0076

Received April 19, 2018; accepted June 14, 2018

**\*Corresponding author: Sepehr Sadegh-Samiei**, Department of Chemistry, East Tehran Branch, Islamic Azad University, P. O. Box 18735-138, Tehran, I. R. Iran; e-mail: sepehr.samiei@gmail.com

**Shahrzad Abdolmohammadi**: Young Researchers and Elite Club, East Tehran Branch, Islamic Azad University, P. O. Box 18735-138, Tehran, I. R. Iran, e-mail: s.abdolmohamadi@yahoo.com; s.abdolmohamadi@iauet.ac.ir

**Abstract:** A novel and efficient synthesis of eight 5-aryl-1,3-dimethyl-2,4-dioxo-1,2,3,4,5,8-hexahydropyrido[2,3-*d*]pyrimidine-7-carboxylic acids using a TiO<sub>2</sub>/SiO<sub>2</sub> nanocomposite with a molar ratio of 1 : 1 as a recyclable heterogeneous catalyst is described. The desired products, five of which are new, are formed in short reaction times (2–3 h) with high to excellent yields (94–98%) under very moderate reaction conditions (room temperature, aqueous media).

# <sup>1</sup>H NMR of 4a

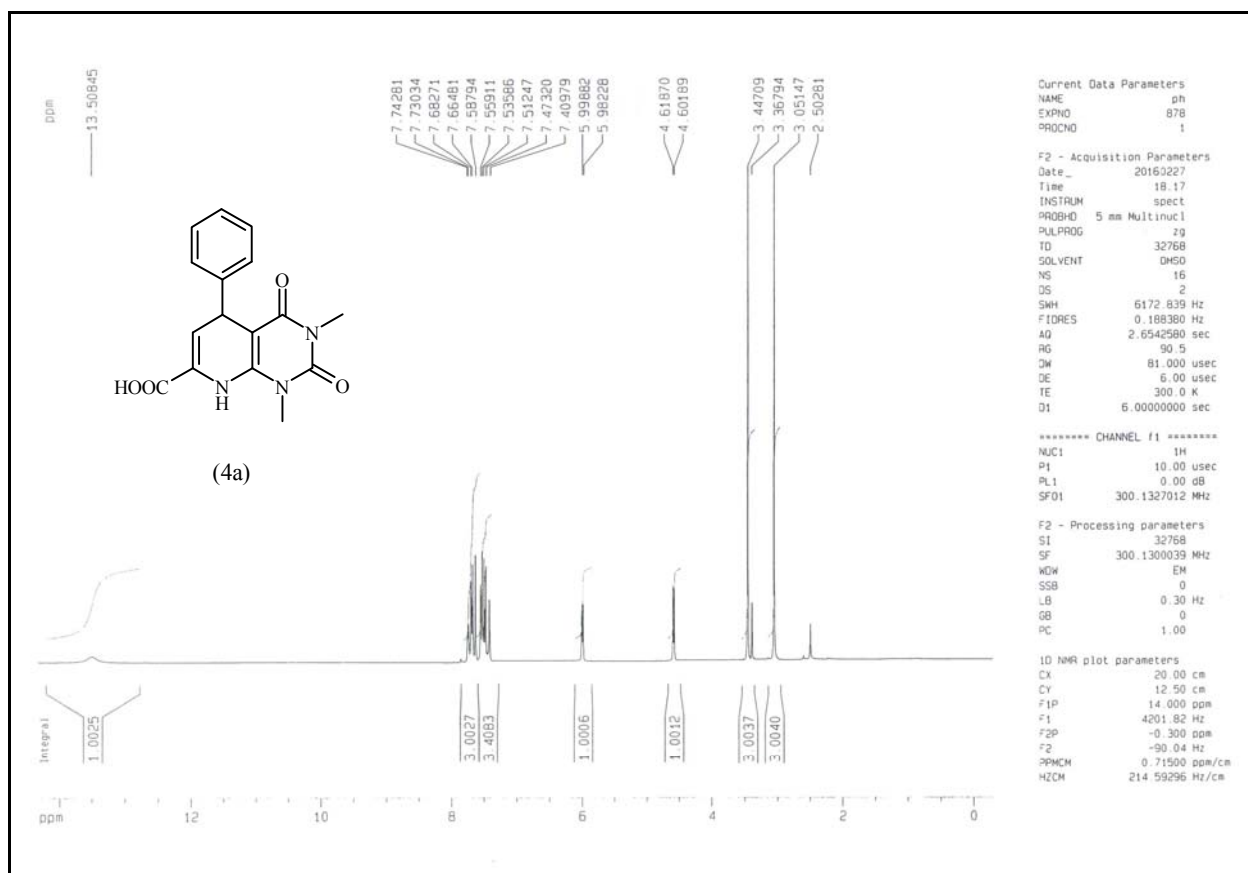

<sup>13</sup>C NMR of **4a**

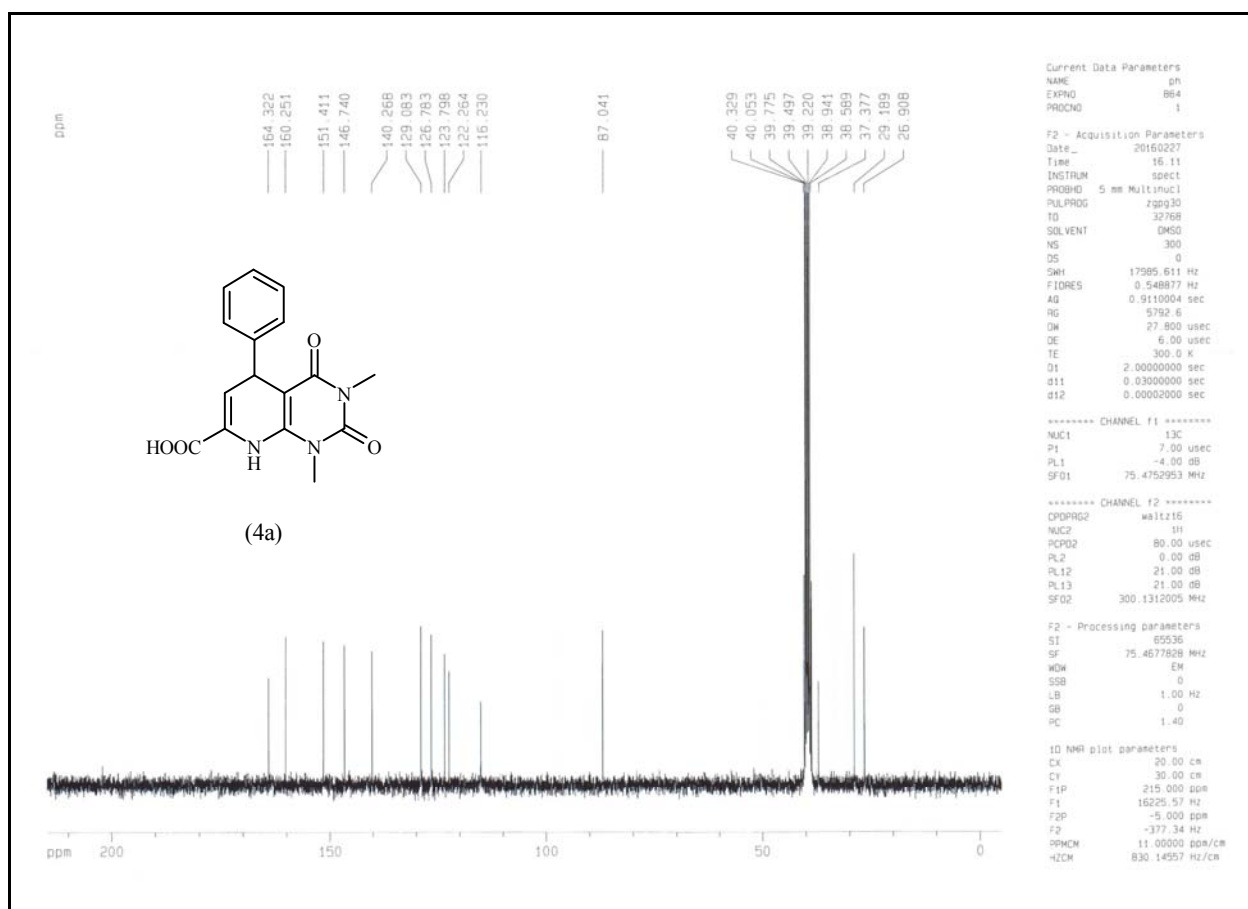

# <sup>1</sup>H NMR of **4b**

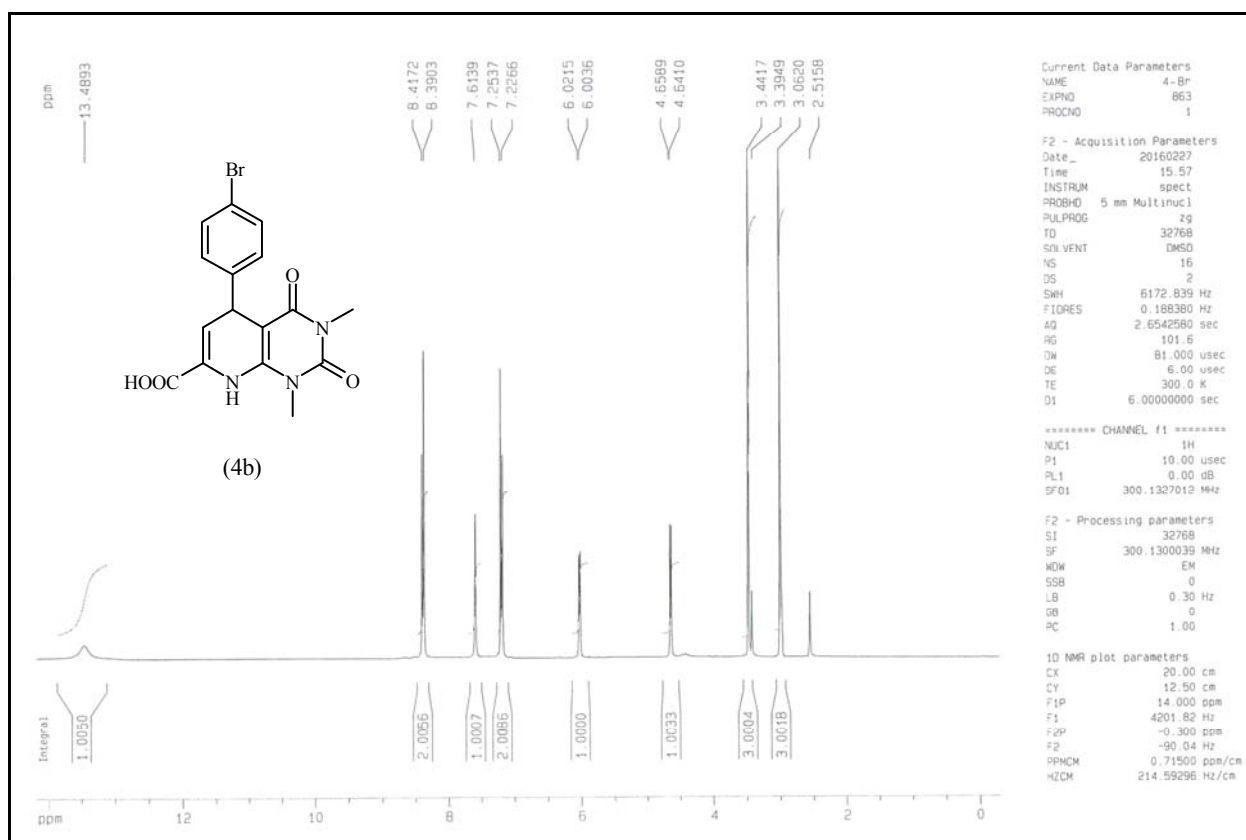

<sup>13</sup>C NMR of **4b**

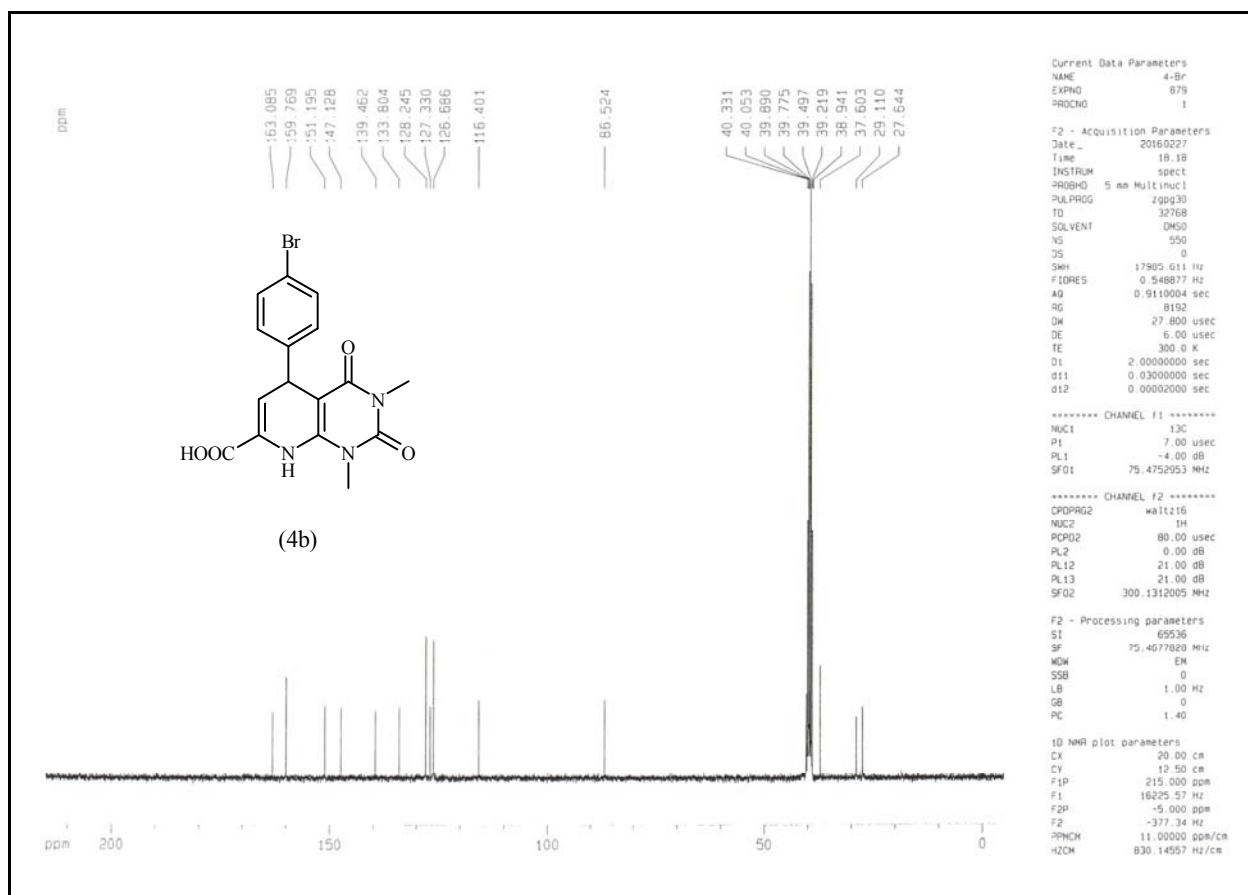

# <sup>1</sup>H NMR of 4h

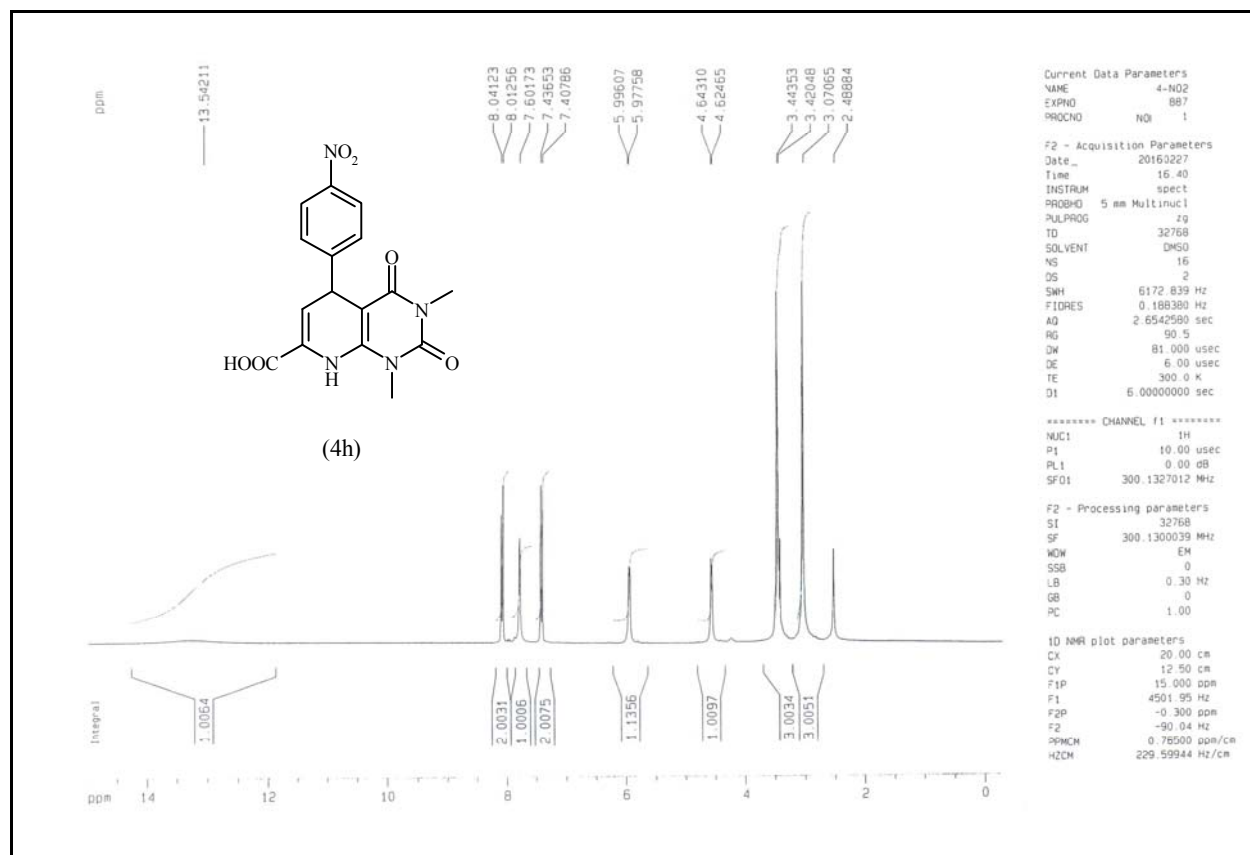

<sup>13</sup>C NMR of 4h

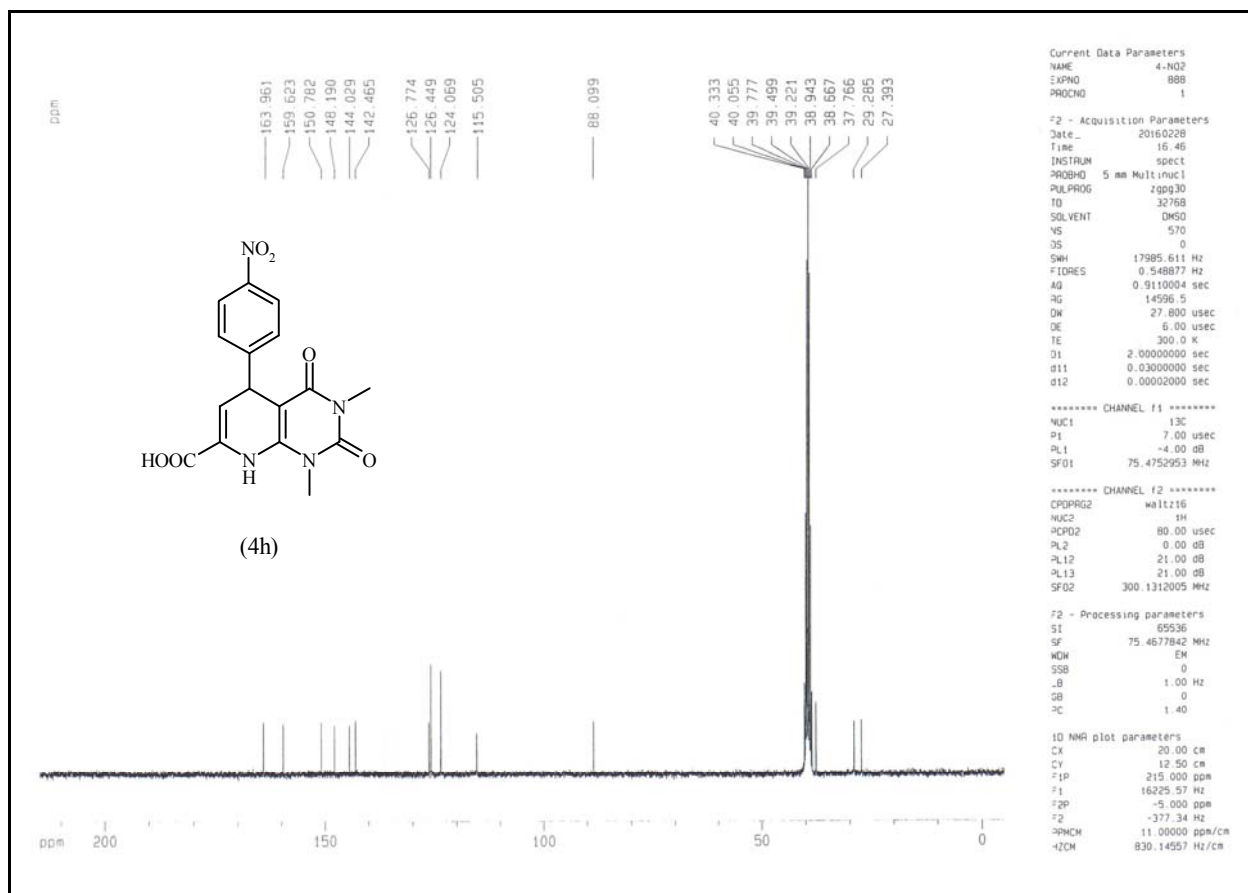

Supplement: Supplementary file 1 [file znb-2018-0076_suppl.pdf]
